# Supplementary material for: Expression Of Intracellular Components of the NF-κB Alternative Pathway (NF-κB2, RelB, NIK and Bcl3) is Associated With Clinical Outcome of NSCLC Patients
Source: PubMed Central journal article supplement (PMC6778110; doi:10.1038/s41598-019-50528-y), 2019-10-04
Supplement: 41598_2019_50528_MOESM5_ESM.pdf [file 41598_2019_50528_MOESM5_ESM.pdf]

# **Expression Of Major Intracellular Components of the NF- $\kappa$ B Alternative Pathway (NF- $\kappa$ B2, RelB, NIK and Bcl3) is Associated With Clinical Outcome of NSCLC Patients**

<sup>1§</sup>Foteinos-Ioannis D. Dimitrakopoulos, <sup>1§</sup>Anna G. Antonacopoulou, <sup>1§</sup>Anastasia E. Kottorou, <sup>2</sup>Nikolaos Panagopoulos, <sup>1</sup>Fotini Kalofonou, <sup>3</sup>Fotios Sampsonas, <sup>4</sup>Chrisoula Scopa, <sup>5</sup>Melpomeni Kalofonou, <sup>1</sup>Angelos Koutras, <sup>1</sup>Thomas Makatsoris, <sup>2</sup>Dimitrios Dougenis, <sup>6</sup>Helen Papadaki, <sup>7</sup>Malcolm Brock, <sup>1\*</sup>Haralabos P. Kalofonos

<sup>1</sup>Molecular Oncology Laboratory, Division of Oncology, Department of Internal Medicine, Medical School, University of Patras, Patras, Greece.

<sup>2</sup>Department of Cardiothoracic Surgery, Medical School, University of Patras, Patras, Greece.

<sup>3</sup>Department of Respiratory Medicine, University Hospital of Patras, Patras, Greece.

<sup>4</sup>Department of Pathology, Medical School, University of Patras, Patras, Greece.

<sup>5</sup>Institute of Biomedical Engineering, Imperial College London, London, United Kingdom.

<sup>6</sup>Department of Anatomy, Medical School, University of Patras, Patras, Greece.

<sup>7</sup>Division of Thoracic Surgery, Department of Surgery, School of Medicine, Johns Hopkins University, Baltimore, MD, USA.

§ These authors contributed equally to this work.

\*Corresponding author: Prof. Haralabos P. Kalofonos, Division of Oncology, Department of Internal Medicine, Medical School, University of Patras, Rion-Patras 26504, Greece. Tel.: +30 2610999535, Fax: +30 2610994645, E-mail: kalofonos@upatras.gr

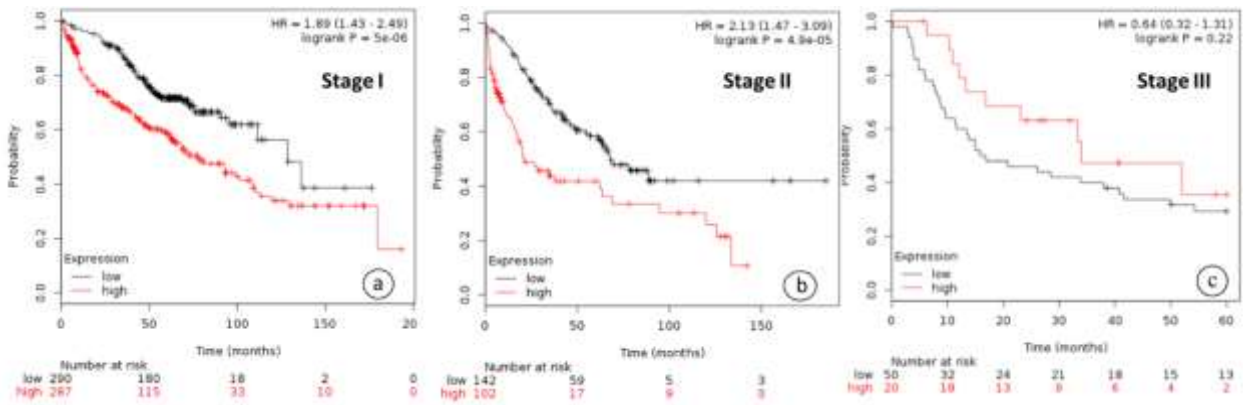

**Supplementary Figure 5.** Kaplan-Meier plots of *Bcl3* gene expression and OS in a) stage I, b) stage II and c) stage III NSCLC patients based on the internet-based platform KM-plotter.
