# Supplementary material for: Expression Of Intracellular Components of the NF-κB Alternative Pathway (NF-κB2, RelB, NIK and Bcl3) is Associated With Clinical Outcome of NSCLC Patients
Source: PubMed Central journal article supplement (PMC6778110; doi:10.1038/s41598-019-50528-y), 2019-10-04
Supplement: 41598_2019_50528_MOESM6_ESM.pdf [file 41598_2019_50528_MOESM6_ESM.pdf]

**Expression Of Major Intracellular Components of the NF- $\kappa$ B  
Alternative Pathway (NF- $\kappa$ B2, RelB, NIK and Bcl3) is Associated  
With Clinical Outcome of NSCLC Patients**

<sup>1§</sup>Foteinos-Ioannis D. Dimitrakopoulos, <sup>1§</sup>Anna G. Antonacopoulou, <sup>1§</sup>Anastasia E. Kottorou, <sup>2</sup>Nikolaos Panagopoulos, <sup>1</sup>Fotini Kalofonou, <sup>3</sup>Fotios Sampsonas, <sup>4</sup>Chrisoula Scopa, <sup>5</sup>Melpomeni Kalofonou, <sup>1</sup>Angelos Koutras, <sup>1</sup>Thomas Makatsoris, <sup>2</sup>Dimitrios Dougenis, <sup>6</sup>Helen Papadaki, <sup>7</sup>Malcolm Brock, <sup>1\*</sup>Haralabos P. Kalofonos

<sup>1</sup>Molecular Oncology Laboratory, Division of Oncology, Department of Internal Medicine, Medical School, University of Patras, Patras, Greece.

<sup>2</sup>Department of Cardiothoracic Surgery, Medical School, University of Patras, Patras, Greece.

<sup>3</sup>Department of Respiratory Medicine, University Hospital of Patras, Patras, Greece.

<sup>4</sup>Department of Pathology, Medical School, University of Patras, Patras, Greece.

<sup>5</sup>Institute of Biomedical Engineering, Imperial College London, London, United Kingdom.

<sup>6</sup>Department of Anatomy, Medical School, University of Patras, Patras, Greece.

<sup>7</sup>Division of Thoracic Surgery, Department of Surgery, School of Medicine, Johns Hopkins University, Baltimore, MD, USA.

§ These authors contributed equally to this work.

\*Corresponding author: Prof. Haralabos P. Kalofonos, Division of Oncology, Department of Internal Medicine, Medical School, University of Patras, Rion-Patras 26504, Greece. Tel.: +30 2610999535, Fax: +30 2610994645, E-mail: kalofonos@upatras.gr

| <b>Clinicopathological characteristics</b> | <b>Cases<br/><i>n</i> (%)</b> |
|--------------------------------------------|-------------------------------|
| <b>Total</b>                               | <b>151 (100)</b>              |
| <b>Age (years) Median (range)</b>          | <b>66 (40-84)</b>             |
| <b>Gender</b>                              |                               |
| <b>Total</b>                               | <b>151 (100)</b>              |
| <b>Male</b>                                | <b>139 (92.1)</b>             |
| <b>Female</b>                              | <b>12 (7.9)</b>               |
| <b>Smoking (pack-years)</b>                |                               |
| <b>Total</b>                               | <b>151 (100)</b>              |
| <b>Cases (%)</b>                           | <b>59 (39.1)</b>              |
| <b>Mean (range)</b>                        | <b>87.63 (20-165)</b>         |
| <b>NA</b>                                  | <b>92 (60.9)</b>              |
| <b>Primary location</b>                    |                               |
| <b>Total</b>                               | <b>151 (100)</b>              |
| <b>Left lung</b>                           | <b>66 (43.7)</b>              |
| <b>Right lung</b>                          | <b>85 (56.3)</b>              |
| <b>NA</b>                                  | <b>-</b>                      |
| <b>Histology</b>                           |                               |
| <b>Total</b>                               | <b>151 (100)</b>              |
| <b>Squamous</b>                            | <b>86 (57.0)</b>              |
| <b>Adenocarcinoma</b>                      | <b>54 (35.8)</b>              |
| <b>Large carcinoma</b>                     | <b>10 (6.6)</b>               |
| <b>NA</b>                                  | <b>1 (0.6)</b>                |
| <b>Stage</b>                               |                               |
| <b>Total</b>                               | <b>151 (100)</b>              |
| <b>I</b>                                   | <b>59 (39.1)</b>              |
| <b>II</b>                                  | <b>44 (29.1)</b>              |
| <b>III</b>                                 | <b>45 (29.8)</b>              |
| <b>IV</b>                                  | <b>2 (1.3)</b>                |
| <b>NA</b>                                  | <b>1 (0.7)</b>                |
| <b>Grade</b>                               |                               |

|                                |                          |
|--------------------------------|--------------------------|
| <b>Total</b>                   | <b>151 (100)</b>         |
| <b>I</b>                       | <b>4 (2.6)</b>           |
| <b>II</b>                      | <b>70 (46.4)</b>         |
| <b>III</b>                     | <b>67 (44.4)</b>         |
| <b>NA</b>                      | <b>10 (6.6)</b>          |
| <b>Maximum diameter (cm)</b>   |                          |
| <b>Total</b>                   | <b>151 (100)</b>         |
| <b>Cases (%)</b>               | <b>147 (97.4)</b>        |
| <b>Mean (range)</b>            | <b>5.09 (0.70-21.00)</b> |
| <b>NA</b>                      | <b>4 (2.6)</b>           |
| <b>Lymph node infiltration</b> |                          |
| <b>Total</b>                   | <b>151 (100)</b>         |
| <b>No</b>                      | <b>79 (52.3)</b>         |
| <b>Yes</b>                     | <b>65 (43.0)</b>         |
| <b>NA</b>                      | <b>7 (4.6)</b>           |
| <b>Metastasis (adrenals)*</b>  |                          |
| <b>Total</b>                   | <b>151 (100)</b>         |
| <b>No</b>                      | <b>29 (19.2)</b>         |
| <b>Yes</b>                     | <b>7 (4.6)</b>           |
| <b>NA</b>                      | <b>115 (76.2)</b>        |
| <b>Metastasis (liver)*</b>     |                          |
| <b>Total</b>                   | <b>151 (100)</b>         |
| <b>No</b>                      | <b>30 (19.9)</b>         |
| <b>Yes</b>                     | <b>5 (3.3)</b>           |
| <b>NA</b>                      | <b>116 (76.8)</b>        |
| <b>Metastasis (brain)*</b>     |                          |
| <b>Total</b>                   | <b>151 (100)</b>         |
| <b>No</b>                      | <b>30 (19.70)</b>        |
| <b>Yes</b>                     | <b>9 (6.0)</b>           |
| <b>NA</b>                      | <b>112 (74.2)</b>        |
| <b>Metastasis (bone)*</b>      |                          |
| <b>Total</b>                   | <b>151 (100)</b>         |
| <b>No</b>                      | <b>23 (15.2)</b>         |

|                                                |                  |
|------------------------------------------------|------------------|
| Yes                                            | 17 (11.3)        |
| NA                                             | 111 (73.5)       |
| <b>Metastasis (adrenals-liver-brain-bone)*</b> |                  |
| <b>Total</b>                                   | <b>151 (100)</b> |
| No                                             | 9 (6.0)          |
| Yes                                            | 36 (23.8)        |
| NA                                             | 106 (70.2)       |
| <b>Survival (2 years)</b>                      |                  |
| <b>Total</b>                                   | <b>151 (100)</b> |
| Dead                                           | 56 (37.1)        |
| Alive                                          | 93 (61.6)        |
| NA                                             | 2 (1.3)          |
| <b>Survival (3 years)</b>                      |                  |
| <b>Total</b>                                   | <b>151 (100)</b> |
| Dead                                           | 75 (49.7)        |
| Alive                                          | 71 (47.0)        |
| NA                                             | 5 (3.3)          |
| <b>Survival (5 years)</b>                      |                  |
| <b>Total</b>                                   | <b>151 (100)</b> |
| Dead                                           | 91 (60.3)        |
| Alive                                          | 55 (36.4)        |
| NA                                             | 5 (3.3)          |
| <b>Relapse</b>                                 |                  |
| <b>Total</b>                                   | <b>151 (100)</b> |
| No                                             | 14 (9.3)         |
| Yes                                            | 23 (15.2)        |
| NA                                             | 114 (75.5)       |

**Supplementary Table S1.** Clinicopathological characteristics and survival data of NSCLC patients. Abbreviations: NA, data not available or unknown. \* Metastasis status refers to metastases, which were developed the patients during the observation period.
