# Supplementary material for: Expression Of Intracellular Components of the NF-κB Alternative Pathway (NF-κB2, RelB, NIK and Bcl3) is Associated With Clinical Outcome of NSCLC Patients
Source: PubMed Central journal article supplement (PMC6778110; doi:10.1038/s41598-019-50528-y), 2019-10-04
Supplement: 41598_2019_50528_MOESM7_ESM.pdf [file 41598_2019_50528_MOESM7_ESM.pdf]

**Expression Of Major Intracellular Components of the NF- $\kappa$ B  
Alternative Pathway (NF- $\kappa$ B2, RelB, NIK and Bcl3) is Associated  
With Clinical Outcome of NSCLC Patients**

<sup>1§</sup>Foteinos-Ioannis D. Dimitrakopoulos, <sup>1§</sup>Anna G. Antonacopoulou, <sup>1§</sup>Anastasia E. Kottorou, <sup>2</sup>Nikolaos Panagopoulos, <sup>1</sup>Fotini Kalofonou, <sup>3</sup>Fotios Sampsonas, <sup>4</sup>Chrisoula Scopa, <sup>5</sup>Melpomeni Kalofonou, <sup>1</sup>Angelos Koutras, <sup>1</sup>Thomas Makatsoris, <sup>2</sup>Dimitrios Dougenis, <sup>6</sup>Helen Papadaki, <sup>7</sup>Malcolm Brock, <sup>1\*</sup>Haralabos P. Kalofonos

<sup>1</sup>Molecular Oncology Laboratory, Division of Oncology, Department of Internal Medicine, Medical School, University of Patras, Patras, Greece.

<sup>2</sup>Department of Cardiothoracic Surgery, Medical School, University of Patras, Patras, Greece.

<sup>3</sup> Department of Respiratory Medicine, University Hospital of Patras, Patras, Greece.

<sup>4</sup>Department of Pathology, Medical School, University of Patras, Patras, Greece.

<sup>5</sup>Institute of Biomedical Engineering, Imperial College London, London, United Kingdom.

<sup>6</sup>Department of Anatomy, Medical School, University of Patras, Patras, Greece.

<sup>7</sup>Division of Thoracic Surgery, Department of Surgery, School of Medicine, Johns Hopkins University, Baltimore, MD, USA.

§ These authors contributed equally to this work.

\*Corresponding author: Prof. Haralabos P. Kalofonos, Division of Oncology, Department of Internal Medicine, Medical School, University of Patras, Rion-Patras 26504, Greece. Tel.: +30 2610999535, Fax: +30 2610994645, E-mail: kalofonos@upatras.gr

| Antibody | Clonality | Company    | Catalogue number | Clone | Dilution | Antigen retrieval conditions  | Incubation time            |
|----------|-----------|------------|------------------|-------|----------|-------------------------------|----------------------------|
| NF-kB2   | M         | Santa Cruz | sc-7386          | C-5   | 1:500    | 8mM sodium citrate,<br>PH 6.0 | 2 hours (room temperature) |
| RelB     | P         | Santa Cruz | sc-226           | C-19  | 1:500    | 8mM sodium citrate,<br>PH 6.0 | 2 hours (room temperature) |
| NIK      | M         | Santa Cruz | sc-8417          | A-12  | 1:20     | 1,2 mM EDTA,PH<br>8.0         | 2 hours (room temperature) |
| Bcl3     | M         | Novocastra | NCL-BCL3         | 1E8   | 1:40     | 1,2 mM EDTA,<br>PH 8.0        | 2 hours (room temperature) |

**Supplementary Table S2.** Primary antibodies and their clonality, clone, dilution, antigen retrieval and incubation time information. M: monoclonal, P: polyclonal.
